# Supplementary material for: The influence of cholesterol on melittin lipidation in neutral membranes
Source: Royal Society of Chemistry journal article supplement (doi:10.1039/c8cp06661b), 2018-12-07
Supplement: c8cp06661b1.pdf [file c8cp06661b1.pdf]

## The Influence of Cholesterol on Melittin Lipidation in Neutral Membranes: Supporting Information.

Hannah M. Britt,<sup>a</sup> Jackie A. Mosely<sup>a</sup> and John M. Sanderson <sup>\*a</sup>

<sup>a</sup> Chemistry Department, South Road, Durham DH1 3LE, UK.

### Supporting Figures

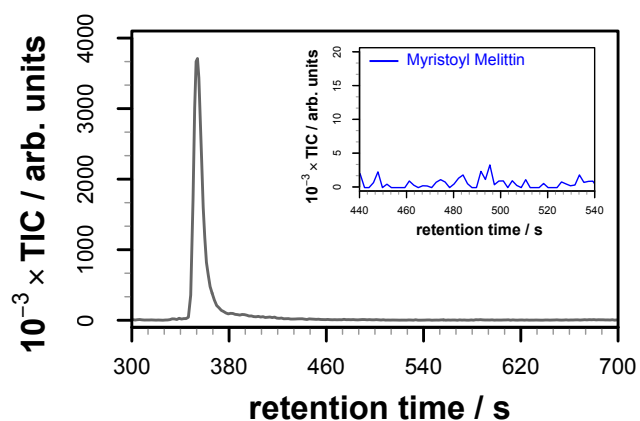

**Fig. S1.** LC-MS analysis (total ion currents, TICs) of a melittin/DMPC liposome mixture after 24 h incubation at 37 °C. Conditions: [melittin], 26  $\mu\text{M}$ ; [DMPC], 0.26 mM (P:L, 1:10); [NaCl], 90 mM; [NaHCO<sub>3</sub>], 10 mM; pH 7.4, 37 °C. The inset shows the extracted ion chromatogram for lipidated (myristoyl) melittin.

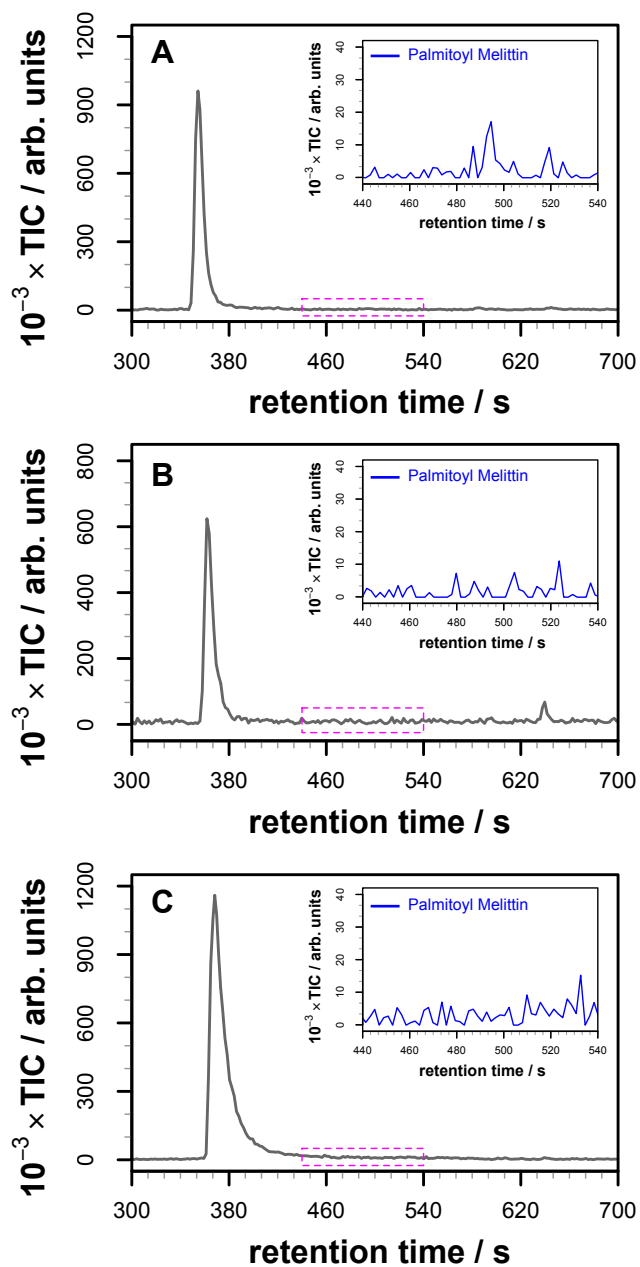

**Fig. S2.** LC-MS analysis (total ion currents, TICs) of melittin/DPPC liposome mixtures. Conditions: [melittin], 26  $\mu\text{M}$ ; [DPPC+chol], 0.26 mM (P:L, 1:10); [NaCl], 90 mM; [NaHCO<sub>3</sub>], 10 mM; pH 7.4. (a) DPPC LUVs + melittin after 6 days at 37 °C (same sample as Fig. 2 in the main paper); (b) DPPC LUVs + melittin, sample heated at 55 °C for 1 h then incubated at 37 °C for 24 h; (c) DPPC SUVs + melittin after 24 h at 37 °C. Insets show extracted ion chromatograms for lipidated melittin in the region indicated by the dashed rectangular box.

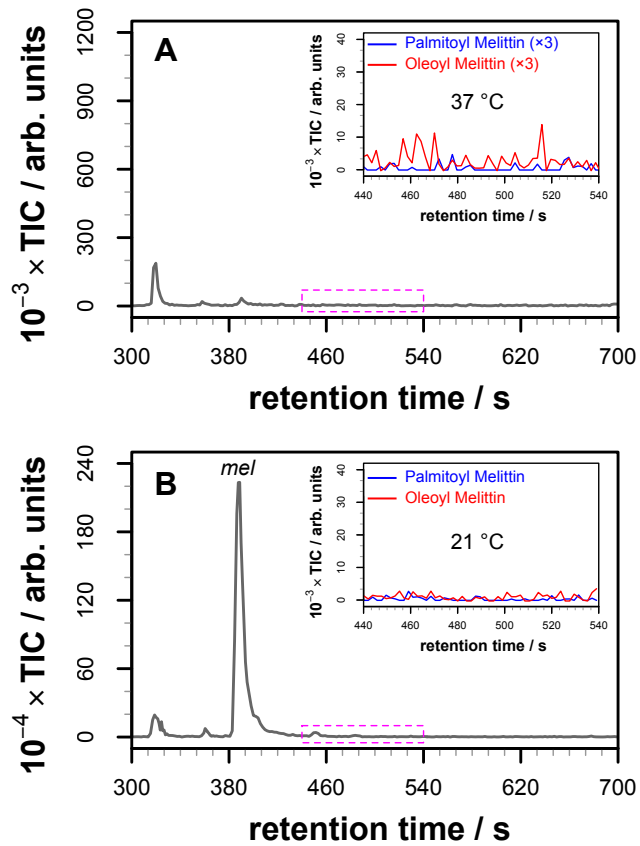

**Fig. S3.** LC-MS analysis (total ion currents, TICs) of melittin and DPPC/DOPC/chol liposome mixtures. Conditions: [melittin], 26  $\mu\text{M}$ ; [DPPC/DOPC/chol (1:1:1)], 0.26 mM (P:L, 1:1:1); [NaCl], 90 mM; [NaHCO<sub>3</sub>], 10 mM; pH 7.4. 37 °C. (a) LUVs + melittin 24 h days at 37 °C; (b) LUVs + melittin, after 24 h at 21 °C. Insets show extracted ion chromatograms for lipidated melittin in the region indicated by the dashed rectangular box.
